# Supplementary material
Source: PubMed Central journal article supplement (PMC7964601)
Supplement: 3063_figures.pdf [file 3063_figures.pdf]

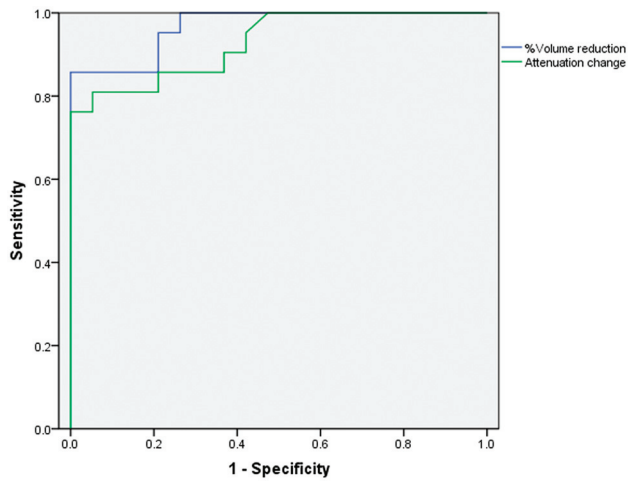

**On-line Fig 1:** The ROC curves of the volume reduction % and attenuation change to diagnose severe dysfunction of the parotid gland.

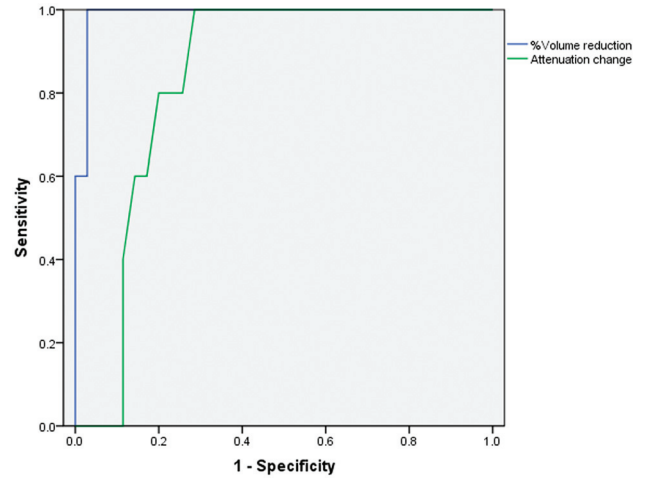

**On-line Fig 2:** The ROC curves of volume reduction % and attenuation change to diagnose severe dysfunction of the submandibular gland.
